# Supplementary material
Source: HighWire-hosted journal article supplement (http://bmjopenquality.bmj.com/highwire/filestream/136263/field_highwire_adjunct_files/1/ds6706.pdf)

## ANTIMICROBIAL STEWARDSHIP QUALITY IMPROVEMENT PROCESS

Compliance rates with documentation of indication and duration in drug charts and interventions carried out:

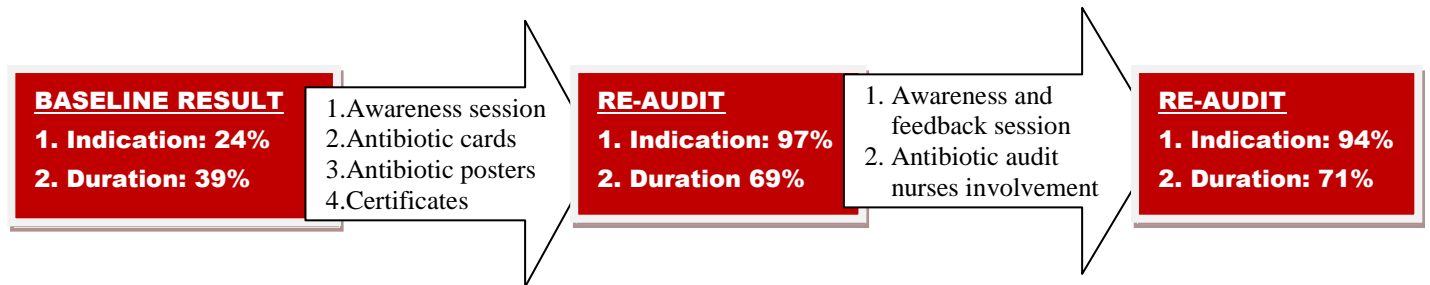

Supplement: ds6706.pdf [file ds6706.pdf]
